# Supplementary material for: Determining composition of micron-scale protein deposits in neurodegenerative disease by spatially targeted optical microproteomics
Source: eLife journal article supplement (doi:10.7554/elife.09579), 2015-09-29
Supplement: supp [file elife-09579-supp-v1.zip]

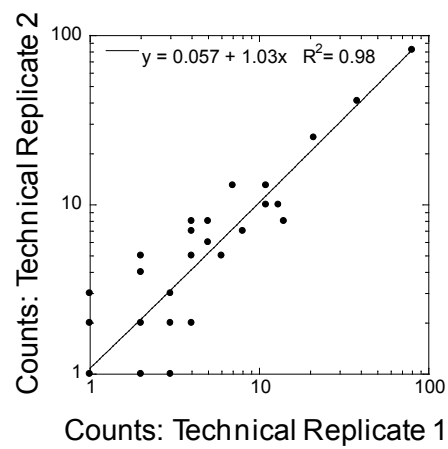

Figure 2—figure supplement 1. **Cross correlation of technical replicates.** Cross correlation of spectral counts for all protein identifications are shown for duplicate runs of STOMP analysis on human amyloid plaque material.
