# Supplementary material for: Determining composition of micron-scale protein deposits in neurodegenerative disease by spatially targeted optical microproteomics
Source: eLife journal article supplement (doi:10.7554/elife.09579), 2015-09-29
Supplement: supp [file elife-09579-supp-v1.zip]

Table ST1: All proteins identified by STOMP from TgCRND8 mouse plaques

| Bait    | Prey   | PreyGene      | IP            | Spec  | Spec Sum | Num Rep | Prob | iProb     | Ctrl Counts | AvgP   | MaxP  | SAINT score |
|---------|--------|---------------|---------------|-------|----------|---------|------|-----------|-------------|--------|-------|-------------|
| amyloid | P60879 | SNP25_MOUSE_1 | STOMP1 STOMP2 | 5 36  | 41       | 2       | 0.56 | 0.11 1.00 | 3 0.5545    | 1      |       | 1.00        |
| amyloid | Q8BH59 | CMC1_MOUSE_1  | STOMP1 STOMP2 | 30 25 | 55       | 2       | 1    | 1.00 1.00 | 2 4         | 1      | 1     | 1.00        |
| amyloid | P63017 | HSP7C_MOUSE_1 | STOMP2        | 21    | 21       | 1       | 1    | 1         | 2 0.9990    | 0.999  |       | 1.00        |
| amyloid | O08599 | STXB1_MOUSE_1 | STOMP1 STOMP2 | 37 42 | 79       | 2       | 1    | 1.00 1.00 | 11 20       | 0.9965 | 0.998 | 1.00        |
| amyloid | Q9CZU6 | CISY_MOUSE_1  | STOMP1 STOMP2 | 13 23 | 36       | 2       | 0.99 | 0.99 1.00 | 3 0.9905    | 0.996  |       | 1.00        |
| amyloid | P39053 | DYN1_MOUSE_1  | STOMP1 STOMP2 | 5 45  | 50       | 2       | 0.49 | 0.00 1.00 | 7 0.4975    | 0.995  |       | 1.00        |
| amyloid | Q62261 | SPTB2_MOUSE_1 | STOMP1 STOMP2 | 34 57 | 91       | 2       | 0.99 | 0.99 1.00 | 11 15       | 0.995  | 1     | 1.00        |
| amyloid | P50516 | VATA_MOUSE_1  | STOMP1 STOMP2 | 13 38 | 51       | 2       | 0.75 | 0.50 0.99 | 7 0.7440    | 0.993  |       | 0.99        |
| amyloid | Q8K2B3 | DHSA_MOUSE_1  | STOMP1 STOMP2 | 15 14 | 29       | 2       | 0.99 | 0.99 0.99 | 2 0.9905    | 0.993  |       | 0.99        |
| amyloid | P46660 | AINX_MOUSE_1  | STOMP1 STOMP2 | 2 32  | 34       | 2       | 0.51 | 0.00 0.98 | 6 0.4930    | 0.984  |       | 0.98        |
| amyloid | Q9D0M3 | CY1_MOUSE_1   | STOMP1 STOMP2 | 21 17 | 38       | 2       | 0.99 | 0.98 0.98 | 6 6         | 0.983  | 0.984 | 0.98        |
| amyloid | P17710 | HXK1_MOUSE_1  | STOMP1 STOMP2 | 14 26 | 40       | 2       | 0.98 | 0.97 1.00 | 4 3         | 0.9815 | 0.997 | 1.00        |
| amyloid | P11499 | HS90B_MOUSE_1 | STOMP1 STOMP2 | 7 17  | 24       | 2       | 0.85 | 0.70 0.98 | 2 0.8425    | 0.981  |       | 0.98        |
| amyloid | P52480 | KPYM_MOUSE_1  | STOMP1 STOMP2 | 15 41 | 56       | 2       | 0.7  | 0.45 0.98 | 9 0.7155    | 0.981  |       | 0.98        |
| amyloid | Q9Z1G4 | VPP1_MOUSE_1  | STOMP1 STOMP2 | 13 23 | 36       | 2       | 0.95 | 0.90 0.98 | 5 0.9395    | 0.981  |       | 0.98        |
| amyloid | Q8VDN2 | AT1A1_MOUSE_1 | STOMP1 STOMP2 | 35 52 | 87       | 2       | 0.98 | 0.97 0.99 | 13 20       | 0.98   | 0.994 | 0.99        |
| amyloid | Q9R0K7 | AT2B2_MOUSE_1 | STOMP2        | 14    | 14       | 1       | 0.97 | 0.97      | 2 0.9720    | 0.972  |       | 0.97        |
| amyloid | P00405 | COX2_MOUSE_1  | STOMP1 STOMP2 | 8 13  | 21       | 2       | 0.97 | 0.95 0.97 | 2 0.9625    | 0.971  |       | 0.97        |
| amyloid | P63101 | 1433Z_MOUSE_1 | STOMP2        | 18    | 18       | 1       | 0.97 | 0.97      | 5 0.9680    | 0.968  |       | 0.97        |
| amyloid | P80314 | TCPB_MOUSE_1  | STOMP2        | 13    | 13       | 1       | 0.95 | 0.95      | 3 0.9540    | 0.954  |       | 0.95        |
| amyloid | Q6PIE5 | AT1A2_MOUSE_1 | STOMP1 STOMP2 | 14 18 | 32       | 2       | 0.92 | 0.91 0.95 | 6 0.9320    | 0.953  |       | 0.95        |
| amyloid | Q9DCT2 | NDUS3_MOUSE_1 | STOMP2        | 10    | 10       | 1       | 0.95 | 0.95      | 2 0.9480    | 0.948  |       | 0.95        |
| amyloid | Q91VD9 | NDUS1_MOUSE_1 | STOMP1 STOMP2 | 4 20  | 24       | 2       | 0.5  | 0.03 0.95 | 5 0.4895    | 0.946  |       | 0.95        |
| amyloid | P05213 | TBA1B_MOUSE_1 | STOMP1 STOMP2 | 15 24 | 39       | 2       | 0.95 | 0.92 0.97 | 4 9         | 0.945  | 0.972 | 0.97        |
| amyloid | P63038 | CH60_MOUSE_1  | STOMP2        | 21    | 21       | 1       | 0.95 | 0.95      | 8 0.9450    | 0.945  |       | 0.95        |
| amyloid | P50396 | GDIA_MOUSE_1  | STOMP1 STOMP2 | 5 15  | 20       | 2       | 0.73 | 0.52 0.94 | 2 0.7295    | 0.943  |       | 0.94        |
| amyloid | Q9DC69 | NDUA9_MOUSE_1 | STOMP1 STOMP2 | 8 15  | 23       | 2       | 0.94 | 0.90 0.99 | 2 3         | 0.943  | 0.989 | 0.99        |
| amyloid | P07901 | HS90A_MOUSE_1 | STOMP1 STOMP2 | 7 23  | 30       | 2       | 0.51 | 0.12 0.94 | 7 0.5300    | 0.938  |       | 0.94        |
| amyloid | P09411 | PGK1_MOUSE_1  | STOMP2        | 14    | 14       | 1       | 0.93 | 0.93      | 5 0.9340    | 0.934  |       | 0.93        |
| amyloid | Q6PIC6 | AT1A3_MOUSE_1 | STOMP1 STOMP2 | 27 37 | 64       | 2       | 0.93 | 0.87 0.98 | 16 13       | 0.9275 | 0.984 | 0.98        |
| amyloid | P56564 | EAA1_MOUSE_1  | STOMP1 STOMP2 | 7 10  | 17       | 2       | 0.88 | 0.84 0.92 | 2 0.8800    | 0.92   |       | 0.92        |
| amyloid | P62204 | CALM_MOUSE_1  | STOMP2        | 16    | 16       | 1       | 0.92 | 0.92      | 0.918       | 0.918  |       | 0.92        |

| Bait    | Prey   | PreyGene      | IP            | Spec    | Spec Sum | Num Rep | Prob | iProb     | Ctrl Counts | AvgP   | MaxP  | SAINT score |
|---------|--------|---------------|---------------|---------|----------|---------|------|-----------|-------------|--------|-------|-------------|
| amyloid | Q9CZ13 | QCR1_MOUSE_1  | STOMP1 STOMP2 | 19 27   | 46       | 2       | 0.85 | 0.81 0.91 | 11 0.8580   | 0.908  |       | 0.91        |
| amyloid | P84078 | ARF1_MOUSE_1  | STOMP2        | 17      | 17       | 1       | 0.91 | 0.91      | 0.907       | 0.907  |       | 0.91        |
| amyloid | Q64332 | SYN2_MOUSE_1  | STOMP1 STOMP2 | 7 23    | 30       | 2       | 0.54 | 0.16 0.91 | 7 0.5310    | 0.905  |       | 0.91        |
| amyloid | P43006 | EAA2_MOUSE_1  | STOMP1 STOMP2 | 52 27   | 79       | 2       | 0.89 | 1.00 0.81 | 25 3        | 0.9045 | 0.998 | 1.00        |
| amyloid | P68369 | TBA1A_MOUSE_1 | STOMP1 STOMP2 | 115 224 | 339      | 2       | 0.9  | 0.86 0.95 | 33 98       | 0.904  | 0.953 | 0.95        |
| amyloid | P58252 | EF2_MOUSE_1   | STOMP1        | 12      | 12       | 1       | 0.9  | 0.9       | 4 0.9020    | 0.902  |       | 0.90        |
| amyloid | Q04447 | KCRB_MOUSE_1  | STOMP1 STOMP2 | 27 57   | 84       | 2       | 0.9  | 0.82 0.98 | 8 22        | 0.9015 | 0.979 | 0.98        |
| amyloid | Q05920 | PYC_MOUSE_1   | STOMP1 STOMP2 | 17 5    | 22       | 2       | 0.5  | 0.90 0.12 | 5 0.5100    | 0.901  |       | 0.90        |
| amyloid | Q99LC3 | NDUAA_MOUSE_1 | STOMP1 STOMP2 | 8 10    | 18       | 2       | 0.87 | 0.84 0.90 | 3 0.8685    | 0.898  |       | 0.90        |
| amyloid | P16330 | CN37_MOUSE_1  | STOMP1 STOMP2 | 16 14   | 30       | 2       | 0.89 | 0.91 0.88 | 10 3        | 0.895  | 0.911 | 0.91        |
| amyloid | P63011 | RAB3A_MOUSE_1 | STOMP2        | 14      | 14       | 1       | 0.9  | 0.9       | 5 0.8950    | 0.895  |       | 0.90        |
| amyloid | P05063 | ALDOC_MOUSE_1 | STOMP1 STOMP2 | 10 12   | 22       | 2       | 0.88 | 0.85 0.89 | 4 0.8730    | 0.894  |       | 0.89        |
| amyloid | P46460 | NSF_MOUSE_1   | STOMP1 STOMP2 | 4 24    | 28       | 2       | 0.46 | 0.03 0.89 | 8 0.4620    | 0.894  |       | 0.89        |
| amyloid | Q9Z0E0 | NCDN_MOUSE_1  | STOMP1 STOMP2 | 8 16    | 24       | 2       | 0.89 | 0.82 0.97 | 2 4         | 0.894  | 0.97  | 0.97        |
| amyloid | Q9ERD7 | TBB3_MOUSE_1  | STOMP1 STOMP2 | 9 29    | 38       | 2       | 0.89 | 0.77 1.00 | 1 4         | 0.886  | 1     | 1.00        |
| amyloid | Q02053 | UBA1_MOUSE_1  | STOMP1 STOMP2 | 9 13    | 22       | 2       | 0.89 | 0.81 0.95 | 3 4         | 0.8775 | 0.947 | 0.95        |
| amyloid | P08551 | NFL_MOUSE_1   | STOMP1 STOMP2 | 3 16    | 19       | 2       | 0.45 | 0.06 0.87 | 5 0.4675    | 0.873  |       | 0.87        |
| amyloid | P63044 | VAMP2_MOUSE_1 | STOMP1 STOMP2 | 3 10    | 13       | 2       | 0.68 | 0.51 0.87 | 2 0.6890    | 0.87   |       | 0.87        |
| amyloid | P62991 | RL40_MOUSE_1  | STOMP2        | 9       | 9        | 1       | 0.87 | 0.87      | 3 0.8660    | 0.866  |       | 0.87        |
| amyloid | Q8BYI9 | TENR_MOUSE_1  | STOMP1 STOMP2 | 9 21    | 30       | 2       | 0.6  | 0.32 0.86 | 8 0.5890    | 0.862  |       | 0.86        |
| amyloid | P18872 | GNAO_MOUSE_1  | STOMP1 STOMP2 | 10 23   | 33       | 2       | 0.86 | 0.72 0.98 | 4 5         | 0.8515 | 0.981 | 0.98        |
| amyloid | Q8C8R3 | ANK2_MOUSE_1  | STOMP1 STOMP2 | 12 9    | 21       | 2       | 0.76 | 0.85 0.70 | 2 0.7735    | 0.85   |       | 0.85        |
| amyloid | Q8BFZ3 | ACTBL_MOUSE_1 | STOMP1 STOMP2 | 17 26   | 43       | 2       | 0.84 | 0.73 0.96 | 5 15        | 0.8455 | 0.96  | 0.96        |
| amyloid | Q7TSJ2 | MAP6_MOUSE_1  | STOMP1 STOMP2 | 4 21    | 25       | 2       | 0.47 | 0.04 0.84 | 7 0.4430    | 0.844  |       | 0.84        |
| amyloid | Q7TQI3 | OTUB1_MOUSE_1 | STOMP1 STOMP2 | 2 9     | 11       | 2       | 0.58 | 0.36 0.84 | 1 0.6000    | 0.842  |       | 0.84        |
| amyloid | Q9Z2Q6 | SEPT5_MOUSE_1 | STOMP2        | 9       | 9        | 1       | 0.83 | 0.83      | 3 0.8260    | 0.826  |       | 0.83        |
| amyloid | P61922 | GABT_MOUSE_1  | STOMP1 STOMP2 | 16 25   | 41       | 2       | 0.8  | 0.77 0.82 | 0.797       | 0.823  |       | 0.82        |
| amyloid | Q6P8J7 | KCRS_MOUSE_1  | STOMP2        | 7       | 7        | 1       | 0.82 | 0.82      | 2 0.8150    | 0.815  |       | 0.82        |
| amyloid | Q02248 | CTNB1_MOUSE_1 | STOMP1 STOMP2 | 12 7    | 19       | 2       | 0.71 | 0.81 0.59 | 4 0.7005    | 0.809  |       | 0.81        |
| amyloid | P15105 | GLNA_MOUSE_1  | STOMP1 STOMP2 | 14 16   | 30       | 2       | 0.79 | 0.78 0.83 | 5 10        | 0.8065 | 0.832 | 0.83        |
| amyloid | P17742 | PPIA_MOUSE_1  | STOMP2        | 10      | 10       | 1       | 0.79 | 0.79      | 0.79        | 0.79   |       | 0.79        |
| amyloid | Q76MZ3 | 2AAA_MOUSE_1  | STOMP1 STOMP2 | 4 11    | 15       | 2       | 0.6  | 0.39 0.79 | 3 0.5900    | 0.789  |       | 0.79        |

| Bait    | Prey   | PreyGene      | IP            | Spec  | Spec Sum | Num Rep | Prob | iProb     | Ctrl Counts | AvgP   | MaxP  | SAINT score |
|---------|--------|---------------|---------------|-------|----------|---------|------|-----------|-------------|--------|-------|-------------|
| amyloid | P62880 | GBB2_MOUSE_1  | STOMP1 STOMP2 | 10 17 | 27       | 2       | 0.75 | 0.73 0.79 | 0.7575      | 0.785  |       | 0.79        |
| amyloid | P62814 | VATB2_MOUSE_1 | STOMP1 STOMP2 | 8 55  | 63       | 2       | 0.47 | 0.21 0.78 | 0.496       | 0.78   |       | 0.78        |
| amyloid | P50518 | VATE1_MOUSE_1 | STOMP2        | 10    | 10       | 1       | 0.77 | 0.77      | 0.766       | 0.766  |       | 0.77        |
| amyloid | P62874 | GBB1_MOUSE_1  | STOMP1 STOMP2 | 6 22  | 28       | 2       | 0.59 | 0.42 0.76 | 0.5885      | 0.761  |       | 0.76        |
| amyloid | P31324 | KAP3_MOUSE_1  | STOMP2        | 16    | 16       | 1       | 0.75 | 0.75      | 0.752       | 0.752  |       | 0.75        |
| amyloid | P61982 | 1433G_MOUSE_1 | STOMP2        | 11    | 11       | 1       | 0.75 | 0.75      | 0.748       | 0.748  |       | 0.75        |
| amyloid | P35486 | ODPA_MOUSE_1  | STOMP2        | 12    | 12       | 1       | 0.74 | 0.74      | 0.737       | 0.737  |       | 0.74        |
| amyloid | P99029 | PRDX5_MOUSE_1 | STOMP2        | 8     | 8        | 1       | 0.74 | 0.74      | 0.737       | 0.737  |       | 0.74        |
| amyloid | Q9DB77 | QCR2_MOUSE_1  | STOMP2        | 14    | 14       | 1       | 0.74 | 0.74      | 0.736       | 0.736  |       | 0.74        |
| amyloid | Q9CQV8 | 1433B_MOUSE_1 | STOMP2        | 10    | 10       | 1       | 0.74 | 0.74      | 0.735       | 0.735  |       | 0.74        |
| amyloid | Q61553 | FSCN1_MOUSE_1 | STOMP1 STOMP2 | 2 6   | 8        | 2       | 0.47 | 0.24 0.72 | 2 0.4795    | 0.722  |       | 0.72        |
| amyloid | P02088 | HBB1_MOUSE_1  | STOMP1        | 8     | 8        | 1       | 0.7  | 0.7       | 4 0.7040    | 0.704  |       | 0.70        |
| amyloid | P08226 | APOE_MOUSE_1  | STOMP1        | 9     | 9        | 1       | 0.7  | 0.7       | 0.703       | 0.703  |       | 0.70        |
| amyloid | P30275 | KCRU_MOUSE_1  | STOMP1 STOMP2 | 4 14  | 18       | 2       | 0.42 | 0.14 0.70 | 7 0.4200    | 0.701  |       | 0.70        |
| amyloid | O35129 | PHB2_MOUSE_1  | STOMP2        | 10    | 10       | 1       | 0.7  | 0.7       | 0.7         | 0.7    |       | 0.70        |
| amyloid | Q61885 | MOG_MOUSE_1   | STOMP1        | 13    | 13       | 1       | 0.7  | 0.7       | 8 0.6970    | 0.697  |       | 0.70        |
| amyloid | P47708 | RP3A_MOUSE_1  | STOMP1 STOMP2 | 2 6   | 8        | 2       | 0.52 | 0.28 0.70 | 1 0.4855    | 0.696  |       | 0.70        |
| amyloid | P38647 | GRP75_MOUSE_1 | STOMP2        | 12    | 12       | 1       | 0.69 | 0.69      | 7 0.6900    | 0.69   |       | 0.69        |
| amyloid | Q64521 | GPDM_MOUSE_1  | STOMP2        | 18    | 18       | 1       | 0.69 | 0.69      | 0.689       | 0.689  |       | 0.69        |
| amyloid | P17426 | AP2A1_MOUSE_1 | STOMP2        | 25    | 25       | 1       | 0.68 | 0.68      | 0.682       | 0.682  |       | 0.68        |
| amyloid | P62761 | VISL1_MOUSE_1 | STOMP2        | 7     | 7        | 1       | 0.68 | 0.68      | 0.682       | 0.682  |       | 0.68        |
| amyloid | P48962 | ADT1_MOUSE_1  | STOMP1 STOMP2 | 26 14 | 40       | 2       | 0.69 | 0.89 0.47 | 14 9        | 0.6805 | 0.888 | 0.89        |
| amyloid | P14094 | AT1B1_MOUSE_1 | STOMP1 STOMP2 | 5 12  | 17       | 2       | 0.67 | 0.45 0.91 | 2 4         | 0.6795 | 0.914 | 0.91        |
| amyloid | P17156 | HSP72_MOUSE_1 | STOMP1 STOMP2 | 4 8   | 12       | 2       | 0.49 | 0.32 0.67 | 4 0.4975    | 0.674  |       | 0.67        |
| amyloid | O88342 | WDR1_MOUSE_1  | STOMP1        | 6     | 6        | 1       | 0.67 | 0.67      | 2 0.6700    | 0.67   |       | 0.67        |
| amyloid | P19783 | COX41_MOUSE_1 | STOMP2        | 6     | 6        | 1       | 0.67 | 0.67      | 0.669       | 0.669  |       | 0.67        |
| amyloid | P05201 | AATC_MOUSE_1  | STOMP2        | 11    | 11       | 1       | 0.67 | 0.67      | 0.666       | 0.666  |       | 0.67        |
| amyloid | Q9R0Y5 | KAD1_MOUSE_1  | STOMP2        | 6     | 6        | 1       | 0.65 | 0.65      | 0.654       | 0.654  |       | 0.65        |
| amyloid | O08749 | DLDH_MOUSE_1  | STOMP1 STOMP2 | 9 14  | 23       | 2       | 0.62 | 0.58 0.65 | 0.6165      | 0.652  |       | 0.65        |
| amyloid | P67778 | PHB_MOUSE_1   | STOMP2        | 8     | 8        | 1       | 0.65 | 0.65      | 0.65        | 0.65   |       | 0.65        |
| amyloid | Q9EQH3 | VPS35_MOUSE_1 | STOMP2        | 6     | 6        | 1       | 0.65 | 0.65      | 2 0.6500    | 0.65   |       | 0.65        |
| amyloid | P97807 | FUMH_MOUSE_1  | STOMP2        | 12    | 12       | 1       | 0.64 | 0.64      | 0.64        | 0.64   |       | 0.64        |

| Bait    | Prey   | PreyGene      | IP            | Spec  | Spec Sum | Num Rep | Prob | iProb     | Ctrl Counts | AvgP   | MaxP  | SAINT score |
|---------|--------|---------------|---------------|-------|----------|---------|------|-----------|-------------|--------|-------|-------------|
| amyloid | P17183 | ENOG_MOUSE_1  | STOMP1 STOMP2 | 3 20  | 23       | 2       | 0.33 | 0.06 0.64 | 11 0.3510   | 0.638  |       | 0.64        |
| amyloid | Q9R0P9 | UCHL1_MOUSE_1 | STOMP2        | 7     | 7        | 1       | 0.63 | 0.63      | 0.632       | 0.632  |       | 0.63        |
| amyloid | Q8CI94 | PYGB_MOUSE_1  | STOMP1 STOMP2 | 21 19 | 40       | 2       | 0.62 | 0.63 0.62 | 0.626       | 0.63   |       | 0.63        |
| amyloid | Q9CPU4 | MGST3_MOUSE_1 | STOMP1        | 5     | 5        | 1       | 0.63 | 0.63      | 0.63        | 0.63   |       | 0.63        |
| amyloid | P60335 | PCBP1_MOUSE_1 | STOMP2        | 9     | 9        | 1       | 0.63 | 0.63      | 0.628       | 0.628  |       | 0.63        |
| amyloid | P26443 | DHE3_MOUSE_1  | STOMP2        | 12    | 12       | 1       | 0.63 | 0.63      | 0.627       | 0.627  |       | 0.63        |
| amyloid | O88712 | CTBP1_MOUSE_1 | STOMP1        | 11    | 11       | 1       | 0.63 | 0.63      | 0.626       | 0.626  |       | 0.63        |
| amyloid | Q60597 | ODO1_MOUSE_1  | STOMP1 STOMP2 | 10 9  | 19       | 2       | 0.57 | 0.63 0.53 | 7 0.5780    | 0.626  |       | 0.63        |
| amyloid | P05064 | ALDOA_MOUSE_1 | STOMP1 STOMP2 | 8 29  | 37       | 2       | 0.59 | 0.25 1.00 | 2 6         | 0.6225 | 0.997 | 1.00        |
| amyloid | Q9WV92 | E41L3_MOUSE_1 | STOMP1 STOMP2 | 7 3   | 10       | 2       | 0.41 | 0.62 0.22 | 3 0.4190    | 0.617  |       | 0.62        |
| amyloid | P03995 | GFAP_MOUSE_1  | STOMP1 STOMP2 | 6 14  | 20       | 2       | 0.61 | 0.36 0.87 | 4 5         | 0.6155 | 0.867 | 0.87        |
| amyloid | P16546 | SPTN1_MOUSE_1 | STOMP1 STOMP2 | 29 96 | 125      | 2       | 0.61 | 0.23 1.00 | 12 17       | 0.614  | 1     | 1.00        |
| amyloid | Q8QZT1 | THIL_MOUSE_1  | STOMP1 STOMP2 | 2 17  | 19       | 2       | 0.32 | 0.02 0.60 | 10 0.3110   | 0.604  |       | 0.60        |
| amyloid | Q9DB20 | ATPO_MOUSE_1  | STOMP2        | 8     | 8        | 1       | 0.6  | 0.6       | 5 0.6010    | 0.601  |       | 0.60        |
| amyloid | P60487 | PLPP_MOUSE_1  | STOMP2        | 7     | 7        | 1       | 0.6  | 0.6       | 0.6         | 0.6    |       | 0.60        |
| amyloid | P17751 | TPIS_MOUSE_1  | STOMP1 STOMP2 | 1 12  | 13       | 2       | 0.36 | 0.11 0.59 | 0.3505      | 0.593  |       | 0.59        |
| amyloid | Q61206 | PA1B2_MOUSE_1 | STOMP2        | 6     | 6        | 1       | 0.59 | 0.59      | 0.588       | 0.588  |       | 0.59        |
| amyloid | Q9D051 | ODPB_MOUSE_1  | STOMP1 STOMP2 | 2 15  | 17       | 2       | 0.31 | 0.06 0.59 | 9 0.3245    | 0.586  |       | 0.59        |
| amyloid | Q9CQJ8 | NDUB9_MOUSE_1 | STOMP1 STOMP2 | 3 4   | 7        | 2       | 0.55 | 0.53 0.59 | 2 0.5570    | 0.585  |       | 0.59        |
| amyloid | O54983 | CRYM_MOUSE_1  | STOMP2        | 7     | 7        | 1       | 0.58 | 0.58      | 0.58        | 0.58   |       | 0.58        |
| amyloid | P63328 | PP2BA_MOUSE_1 | STOMP1 STOMP2 | 6 14  | 20       | 2       | 0.45 | 0.34 0.58 | 0.4575      | 0.58   |       | 0.58        |
| amyloid | P28652 | KCC2B_MOUSE_1 | STOMP1 STOMP2 | 17 14 | 31       | 2       | 0.55 | 0.61 0.54 | 16 2        | 0.574  | 0.61  | 0.61        |
| amyloid | O08709 | PRDX6_MOUSE_1 | STOMP1 STOMP2 | 3 6   | 9        | 2       | 0.48 | 0.41 0.57 | 0.4865      | 0.568  |       | 0.57        |
| amyloid | P63005 | LIS1_MOUSE_1  | STOMP1        | 4     | 4        | 1       | 0.56 | 0.56      | 2 0.5610    | 0.561  |       | 0.56        |
| amyloid | P63168 | DYL1_MOUSE_1  | STOMP2        | 3     | 3        | 1       | 0.56 | 0.56      | 0.558       | 0.558  |       | 0.56        |
| amyloid | Q9DBJ1 | PGAM1_MOUSE_1 | STOMP1 STOMP2 | 3 8   | 11       | 2       | 0.45 | 0.33 0.56 | 0.445       | 0.558  |       | 0.56        |
| amyloid | P20357 | MTAP2_MOUSE_1 | STOMP1 STOMP2 | 7 9   | 16       | 2       | 0.48 | 0.43 0.56 | 4 0.4910    | 0.556  |       | 0.56        |
| amyloid | O88935 | SYN1_MOUSE_1  | STOMP1 STOMP2 | 8 26  | 34       | 2       | 0.56 | 0.15 0.96 | 2 11        | 0.555  | 0.964 | 0.96        |
| amyloid | Q60829 | PPR1B_MOUSE_1 | STOMP2        | 5     | 5        | 1       | 0.56 | 0.56      | 0.555       | 0.555  |       | 0.56        |
| amyloid | P97427 | DPYL1_MOUSE_1 | STOMP1 STOMP2 | 2 8   | 10       | 2       | 0.36 | 0.15 0.55 | 5 0.3525    | 0.553  |       | 0.55        |
| amyloid | Q9CQ69 | QCR8_MOUSE_1  | STOMP1 STOMP2 | 1 3   | 4        | 2       | 0.46 | 0.38 0.55 | 0.4635      | 0.55   |       | 0.55        |
| amyloid | O70589 | CSKP_MOUSE_1  | STOMP1 STOMP2 | 2 5   | 7        | 2       | 0.42 | 0.31 0.55 | 1 0.4265    | 0.547  |       | 0.55        |



| Bait    | Prey   | PreyGene      | IP            | Spec   | Spec Sum | Num Rep | Prob | iProb     | Ctrl Counts | AvgP   | MaxP  | SAINT score |
|---------|--------|---------------|---------------|--------|----------|---------|------|-----------|-------------|--------|-------|-------------|
| amyloid | P47738 | ALDH2_MOUSE_1 | STOMP2        | 5      | 5        | 1       | 0.55 | 0.55      | 3 0.5450    | 0.545  |       | 0.55        |
| amyloid | P99024 | TBB5_MOUSE_1  | STOMP1 STOMP2 | 4 20   | 24       | 2       | 0.31 | 0.08 0.54 | 14 0.3090   | 0.543  |       | 0.54        |
| amyloid | Q7TPR4 | ACTN1_MOUSE_1 | STOMP1 STOMP2 | 4 17   | 21       | 2       | 0.55 | 0.11 0.98 | 2 3         | 0.5425 | 0.977 | 0.98        |
| amyloid | P62137 | PP1A_MOUSE_1  | STOMP2        | 7      | 7        | 1       | 0.54 | 0.54      | 0.538       | 0.538  |       | 0.54        |
| amyloid | Q810U3 | NFASC_MOUSE_1 | STOMP1 STOMP2 | 3 8    | 11       | 2       | 0.36 | 0.16 0.54 | 4 0.3470    | 0.538  |       | 0.54        |
| amyloid | Q64475 | H2B1B_MOUSE_1 | STOMP1 STOMP2 | 5 2    | 7        | 2       | 0.44 | 0.54 0.30 | 3 0.4205    | 0.537  |       | 0.54        |
| amyloid | Q9D6F9 | TBB4A_MOUSE_1 | STOMP1 STOMP2 | 4 13   | 17       | 2       | 0.51 | 0.19 0.87 | 2 6         | 0.533  | 0.873 | 0.87        |
| amyloid | Q9D6R2 | IDH3A_MOUSE_1 | STOMP1 STOMP2 | 2 10   | 12       | 2       | 0.53 | 0.15 0.91 | 2 2         | 0.533  | 0.912 | 0.91        |
| amyloid | Q9QYR6 | MAP1A_MOUSE_1 | STOMP1 STOMP2 | 11 17  | 28       | 2       | 0.37 | 0.22 0.53 | 11 0.3780   | 0.533  |       | 0.53        |
| amyloid | P14152 | MDHC_MOUSE_1  | STOMP2        | 7      | 7        | 1       | 0.53 | 0.53      | 0.532       | 0.532  |       | 0.53        |
| amyloid | P60710 | ACTB_MOUSE_1  | STOMP1 STOMP2 | 14 40  | 54       | 2       | 0.54 | 0.11 0.95 | 5 22        | 0.5305 | 0.949 | 0.95        |
| amyloid | P63330 | PP2AA_MOUSE_1 | STOMP2        | 7      | 7        | 1       | 0.53 | 0.53      | 0.526       | 0.526  |       | 0.53        |
| amyloid | P62835 | RAP1A_MOUSE_1 | STOMP2        | 4      | 4        | 1       | 0.53 | 0.53      | 0.525       | 0.525  |       | 0.53        |
| amyloid | Q8VDQ8 | SIR2_MOUSE_1  | STOMP1        | 4      | 4        | 1       | 0.51 | 0.51      | 2 0.5110    | 0.511  |       | 0.51        |
| amyloid | O08553 | DPYL2_MOUSE_1 | STOMP1 STOMP2 | 20 76  | 96       | 2       | 0.51 | 0.03 0.99 | 8 23        | 0.5105 | 0.993 | 0.99        |
| amyloid | Q61765 | K1H1_MOUSE_1  | STOMP2        | 8      | 8        | 1       | 0.51 | 0.51      | 0.506       | 0.506  |       | 0.51        |
| amyloid | P01942 | HBA_MOUSE_1   | STOMP1        | 3      | 3        | 1       | 0.5  | 0.5       | 0.503       | 0.503  |       | 0.50        |
| amyloid | P16858 | G3P_MOUSE_1   | STOMP1 STOMP2 | 5 28   | 33       | 2       | 0.29 | 0.09 0.50 | 20 0.2955   | 0.501  |       | 0.50        |
| amyloid | Q68FD5 | CLH1_MOUSE_1  | STOMP1 STOMP2 | 21 114 | 135      | 2       | 0.45 | 0.00 1.00 | 6 40        | 0.5    | 1     | 1.00        |
| amyloid | P17182 | ENOA_MOUSE_1  | STOMP1 STOMP2 | 5 46   | 51       | 2       | 0.52 | 0.00 1.00 | 3 13        | 0.4995 | 0.996 | 1.00        |
| amyloid | P60904 | DNJC5_MOUSE_1 | STOMP1        | 4      | 4        | 1       | 0.5  | 0.5       | 0.498       | 0.498  |       | 0.50        |
| amyloid | P12023 | A4_MOUSE_6    | STOMP1 STOMP2 | 30 4   | 34       | 2       | 0.53 | 0.95 0.05 | 4 5         | 0.4965 | 0.948 | 0.95        |
| amyloid | P61264 | STX1B_MOUSE_1 | STOMP2        | 4      | 4        | 1       | 0.5  | 0.5       | 3 0.4960    | 0.496  |       | 0.50        |
| amyloid | P68254 | 1433T_MOUSE_1 | STOMP2        | 5      | 5        | 1       | 0.5  | 0.5       | 0.496       | 0.496  |       | 0.50        |
| amyloid | Q2M3X8 | PHAR1_MOUSE_1 | STOMP1        | 10     | 10       | 1       | 0.5  | 0.5       | 0.496       | 0.496  |       | 0.50        |
| amyloid | Q7TMM9 | TBB2A_MOUSE_1 | STOMP1 STOMP2 | 65 179 | 244      | 2       | 0.51 | 0.05 0.94 | 23 116      | 0.4935 | 0.942 | 0.94        |
| amyloid | P05202 | AATM_MOUSE_1  | STOMP1 STOMP2 | 8 28   | 36       | 2       | 0.51 | 0.08 0.90 | 7 12        | 0.491  | 0.9   | 0.90        |
| amyloid | P62962 | PROF1_MOUSE_1 | STOMP2        | 3      | 3        | 1       | 0.49 | 0.49      | 0.491       | 0.491  |       | 0.49        |
| amyloid | Q91V41 | RAB14_MOUSE_1 | STOMP2        | 4      | 4        | 1       | 0.49 | 0.49      | 0.49        | 0.49   |       | 0.49        |
| amyloid | P68372 | TBB4B_MOUSE_1 | STOMP1 STOMP2 | 16 48  | 64       | 2       | 0.48 | 0.04 0.92 | 7 32        | 0.4825 | 0.921 | 0.92        |
| amyloid | P84244 | H33_MOUSE_1   | STOMP1 STOMP2 | 1 3    | 4        | 2       | 0.36 | 0.26 0.48 | 0.3655      | 0.476  |       | 0.48        |
| amyloid | Q8BGD5 | CPT1C_MOUSE_1 | STOMP1        | 4      | 4        | 1       | 0.47 | 0.47      | 1 0.4740    | 0.474  |       | 0.47        |

| Bait    | Prey   | PreyGene      | IP            | Spec  | Spec Sum | Num Rep | Prob | iProb     | Ctrl Counts | AvgP   | MaxP  | SAINT score |
|---------|--------|---------------|---------------|-------|----------|---------|------|-----------|-------------|--------|-------|-------------|
| amyloid | P56399 | UBP5_MOUSE_1  | STOMP2        | 14    | 14       | 1       | 0.47 | 0.47      | 0.472       | 0.472  |       | 0.47        |
| amyloid | Q91YT0 | NDUV1_MOUSE_1 | STOMP2        | 7     | 7        | 1       | 0.47 | 0.47      | 0.472       | 0.472  |       | 0.47        |
| amyloid | P42669 | PURA_MOUSE_1  | STOMP2        | 10    | 10       | 1       | 0.47 | 0.47      | 8 0.4700    | 0.47   |       | 0.47        |
| amyloid | P20029 | GRP78_MOUSE_1 | STOMP2        | 11    | 11       | 1       | 0.47 | 0.47      | 9 0.4690    | 0.469  |       | 0.47        |
| amyloid | P70296 | PEBP1_MOUSE_1 | STOMP2        | 4     | 4        | 1       | 0.46 | 0.46      | 3 0.4640    | 0.464  |       | 0.46        |
| amyloid | Q03265 | ATPA_MOUSE_1  | STOMP1 STOMP2 | 13 57 | 70       | 2       | 0.48 | 0.03 0.90 | 9 36        | 0.464  | 0.903 | 0.90        |
| amyloid | Q61696 | HS71A_MOUSE_1 | STOMP1 STOMP2 | 2 8   | 10       | 2       | 0.45 | 0.14 0.78 | 2 4         | 0.4585 | 0.781 | 0.78        |
| amyloid | P14231 | AT1B2_MOUSE_1 | STOMP2        | 5     | 5        | 1       | 0.46 | 0.46      | 0.457       | 0.457  |       | 0.46        |
| amyloid | P62259 | 1433E_MOUSE_1 | STOMP2        | 5     | 5        | 1       | 0.46 | 0.46      | 0.456       | 0.456  |       | 0.46        |
| amyloid | Q9DBG3 | AP2B1_MOUSE_1 | STOMP1 STOMP2 | 8 17  | 25       | 2       | 0.34 | 0.20 0.46 | 0.328       | 0.456  |       | 0.46        |
| amyloid | Q8BMF4 | ODP2_MOUSE_1  | STOMP1 STOMP2 | 4 8   | 12       | 2       | 0.36 | 0.24 0.45 | 6 0.3480    | 0.453  |       | 0.45        |
| amyloid | P61979 | HNRPK_MOUSE_1 | STOMP1 STOMP2 | 2 8   | 10       | 2       | 0.45 | 0.16 0.74 | 5 1         | 0.449  | 0.741 | 0.74        |
| amyloid | Q6X893 | CTL1_MOUSE_1  | STOMP1        | 4     | 4        | 1       | 0.44 | 0.44      | 2 0.4440    | 0.444  |       | 0.44        |
| amyloid | Q91V61 | SFXN3_MOUSE_1 | STOMP2        | 4     | 4        | 1       | 0.44 | 0.44      | 3 0.4410    | 0.441  |       | 0.44        |
| amyloid | P12960 | CNTN1_MOUSE_1 | STOMP1 STOMP2 | 15 14 | 29       | 2       | 0.43 | 0.44 0.43 | 0.4335      | 0.439  |       | 0.44        |
| amyloid | Q99JR1 | SFXN1_MOUSE_1 | STOMP2        | 5     | 5        | 1       | 0.44 | 0.44      | 0.436       | 0.436  |       | 0.44        |
| amyloid | P56480 | ATPB_MOUSE_1  | STOMP1 STOMP2 | 22 80 | 102      | 2       | 0.41 | 0.03 0.83 | 7 56        | 0.431  | 0.83  | 0.83        |
| amyloid | P60202 | MYPR_MOUSE_1  | STOMP1 STOMP2 | 82 10 | 92       | 2       | 0.45 | 0.85 0.01 | 36 10       | 0.4305 | 0.85  | 0.85        |
| amyloid | O55131 | SEPT7_MOUSE_1 | STOMP2        | 7     | 7        | 1       | 0.42 | 0.42      | 0.424       | 0.424  |       | 0.42        |
| amyloid | Q91WD5 | NDUS2_MOUSE_1 | STOMP1        | 3     | 3        | 1       | 0.42 | 0.42      | 2 0.4240    | 0.424  |       | 0.42        |
| amyloid | Q9DB05 | SNAA_MOUSE_1  | STOMP1 STOMP2 | 2 5   | 7        | 2       | 0.31 | 0.18 0.42 | 0.3035      | 0.423  |       | 0.42        |
| amyloid | O08756 | HCD2_MOUSE_1  | STOMP2        | 4     | 4        | 1       | 0.41 | 0.41      | 0.412       | 0.412  |       | 0.41        |
| amyloid | Q61481 | PDE1A_MOUSE_1 | STOMP1        | 8     | 8        | 1       | 0.41 | 0.41      | 0.41        | 0.41   |       | 0.41        |
| amyloid | P21279 | GNAQ_MOUSE_1  | STOMP1 STOMP2 | 2 6   | 8        | 2       | 0.27 | 0.15 0.41 | 0.2805      | 0.408  |       | 0.41        |
| amyloid | P26883 | FKB1A_MOUSE_1 | STOMP2        | 2     | 2        | 1       | 0.41 | 0.41      | 0.407       | 0.407  |       | 0.41        |
| amyloid | Q8R5J9 | PRAF3_MOUSE_1 | STOMP1        | 3     | 3        | 1       | 0.41 | 0.41      | 0.407       | 0.407  |       | 0.41        |
| amyloid | Q9QXV0 | PCSK1_MOUSE_1 | STOMP2        | 3     | 3        | 1       | 0.41 | 0.41      | 0.407       | 0.407  |       | 0.41        |
| amyloid | P10852 | 4F2_MOUSE_1   | STOMP2        | 7     | 7        | 1       | 0.41 | 0.41      | 0.405       | 0.405  |       | 0.41        |
| amyloid | P80315 | TCPD_MOUSE_1  | STOMP2        | 7     | 7        | 1       | 0.41 | 0.41      | 0.405       | 0.405  |       | 0.41        |
| amyloid | Q9WUA3 | K6PP_MOUSE_1  | STOMP2        | 10    | 10       | 1       | 0.4  | 0.4       | 0.401       | 0.401  |       | 0.40        |
| amyloid | P08249 | MDHM_MOUSE_1  | STOMP1 STOMP2 | 7 34  | 41       | 2       | 0.39 | 0.06 0.73 | 2 30        | 0.3965 | 0.733 | 0.73        |
| amyloid | P56812 | PDCD5_MOUSE_1 | STOMP2        | 2     | 2        | 1       | 0.39 | 0.39      | 0.39        | 0.39   |       | 0.39        |

| Bait    | Prey   | PreyGene      | IP            | Spec  | Spec Sum | Num Rep | Prob | iProb     | Ctrl Counts | AvgP  | MaxP  | SAINT score |
|---------|--------|---------------|---------------|-------|----------|---------|------|-----------|-------------|-------|-------|-------------|
| amyloid | Q64467 | G3PT_MOUSE_1  | STOMP1 STOMP2 | 5 6   | 11       | 2       | 0.39 | 0.35 0.42 | 2 5         | 0.389 | 0.424 | 0.42        |
| amyloid | Q9JM14 | NT5C_MOUSE_1  | STOMP2        | 3     | 3        | 1       | 0.39 | 0.39      | 0.389       | 0.389 |       | 0.39        |
| amyloid | Q61316 | HSP74_MOUSE_1 | STOMP2        | 4     | 4        | 1       | 0.39 | 0.39      | 2 0.3880    | 0.388 |       | 0.39        |
| amyloid | P11983 | TCPA_MOUSE_1  | STOMP2        | 7     | 7        | 1       | 0.38 | 0.38      | 0.384       | 0.384 |       | 0.38        |
| amyloid | Q99NE5 | RIMS1_MOUSE_1 | STOMP1 STOMP2 | 4 1   | 5        | 2       | 0.27 | 0.38 0.16 | 2 0.2725    | 0.383 |       | 0.38        |
| amyloid | P47857 | K6PF_MOUSE_1  | STOMP1 STOMP2 | 3 12  | 15       | 2       | 0.24 | 0.07 0.38 | 0.224       | 0.376 |       | 0.38        |
| amyloid | Q8K310 | MATR3_MOUSE_1 | STOMP1 STOMP2 | 14 19 | 33       | 2       | 0.29 | 0.22 0.38 | 17 0.2960   | 0.375 |       | 0.38        |
| amyloid | Q9WTJ4 | FIZ1_MOUSE_1  | STOMP1        | 3     | 3        | 1       | 0.37 | 0.37      | 2 0.3730    | 0.373 |       | 0.37        |
| amyloid | Q61598 | GDIB_MOUSE_1  | STOMP2        | 6     | 6        | 1       | 0.37 | 0.37      | 0.368       | 0.368 |       | 0.37        |
| amyloid | Q99KI0 | ACON_MOUSE_1  | STOMP1 STOMP2 | 23 30 | 53       | 2       | 0.36 | 0.30 0.42 | 9 29        | 0.361 | 0.421 | 0.42        |
| amyloid | P48318 | DCE1_MOUSE_1  | STOMP1 STOMP2 | 2 8   | 10       | 2       | 0.22 | 0.08 0.36 | 0.22        | 0.36  |       | 0.36        |
| amyloid | P10126 | EF1A1_MOUSE_1 | STOMP1 STOMP2 | 4 6   | 10       | 2       | 0.31 | 0.25 0.36 | 0.306       | 0.358 |       | 0.36        |
| amyloid | Q8CAQ8 | IMMT_MOUSE_1  | STOMP2        | 9     | 9        | 1       | 0.36 | 0.36      | 0.357       | 0.357 |       | 0.36        |
| amyloid | Q8BLK3 | LSAMP_MOUSE_1 | STOMP1        | 4     | 4        | 1       | 0.36 | 0.36      | 0.356       | 0.356 |       | 0.36        |
| amyloid | Q8R5H6 | WASF1_MOUSE_1 | STOMP1 STOMP2 | 7 7   | 14       | 2       | 0.35 | 0.36 0.34 | 0.3485      | 0.356 |       | 0.36        |
| amyloid | Q9QYG0 | NDRG2_MOUSE_1 | STOMP1 STOMP2 | 3 5   | 8        | 2       | 0.29 | 0.24 0.36 | 0.2965      | 0.356 |       | 0.36        |
| amyloid | O35643 | AP1B1_MOUSE_1 | STOMP1 STOMP2 | 3 13  | 16       | 2       | 0.2  | 0.06 0.35 | 0.2045      | 0.352 |       | 0.35        |
| amyloid | P62631 | EF1A2_MOUSE_1 | STOMP1 STOMP2 | 2 6   | 8        | 2       | 0.25 | 0.12 0.35 | 0.2335      | 0.352 |       | 0.35        |
| amyloid | P63085 | MK01_MOUSE_1  | STOMP2        | 5     | 5        | 1       | 0.35 | 0.35      | 0.351       | 0.351 |       | 0.35        |
| amyloid | Q8K1M6 | DNM1L_MOUSE_1 | STOMP1 STOMP2 | 3 10  | 13       | 2       | 0.22 | 0.08 0.35 | 0.2165      | 0.35  |       | 0.35        |
| amyloid | Q9Z2I9 | SUCB1_MOUSE_1 | STOMP2        | 5     | 5        | 1       | 0.34 | 0.34      | 0.344       | 0.344 |       | 0.34        |
| amyloid | O35098 | DPYL4_MOUSE_1 | STOMP2        | 7     | 7        | 1       | 0.34 | 0.34      | 0.337       | 0.337 |       | 0.34        |
| amyloid | Q62283 | TSN7_MOUSE_1  | STOMP1 STOMP2 | 3 3   | 6        | 2       | 0.34 | 0.32 0.34 | 0.3295      | 0.336 |       | 0.34        |
| amyloid | P18760 | COF1_MOUSE_1  | STOMP1 STOMP2 | 2 2   | 4        | 2       | 0.3  | 0.34 0.29 | 2 0.3115    | 0.335 |       | 0.34        |
| amyloid | Q9CR62 | M2OM_MOUSE_1  | STOMP1 STOMP2 | 2 4   | 6        | 2       | 0.25 | 0.18 0.33 | 0.257       | 0.334 |       | 0.33        |
| amyloid | Q01853 | TERA_MOUSE_1  | STOMP2        | 9     | 9        | 1       | 0.32 | 0.32      | 0.32        | 0.32  |       | 0.32        |
| amyloid | P27773 | PDIA3_MOUSE_1 | STOMP2        | 6     | 6        | 1       | 0.32 | 0.32      | 0.317       | 0.317 |       | 0.32        |
| amyloid | P12382 | K6PL_MOUSE_1  | STOMP2        | 8     | 8        | 1       | 0.32 | 0.32      | 0.316       | 0.316 |       | 0.32        |
| amyloid | Q9R0P3 | ESTD_MOUSE_1  | STOMP2        | 3     | 3        | 1       | 0.32 | 0.32      | 0.315       | 0.315 |       | 0.32        |
| amyloid | Q9JI91 | ACTN2_MOUSE_1 | STOMP2        | 4     | 4        | 1       | 0.31 | 0.31      | 3 0.3070    | 0.307 |       | 0.31        |
| amyloid | O70305 | ATX2_MOUSE_1  | STOMP1        | 3     | 3        | 1       | 0.31 | 0.31      | 2 0.3050    | 0.305 |       | 0.31        |
| amyloid | P06745 | G6PI_MOUSE_1  | STOMP2        | 6     | 6        | 1       | 0.3  | 0.3       | 0.299       | 0.299 |       | 0.30        |

| Bait    | Prey   | PreyGene      | IP            | Spec | Spec Sum | Num Rep | Prob | iProb     | Ctrl Counts | AvgP   | MaxP  | SAINT score |
|---------|--------|---------------|---------------|------|----------|---------|------|-----------|-------------|--------|-------|-------------|
| amyloid | P48320 | DCE2_MOUSE_1  | STOMP2        | 6    | 6        | 1       | 0.3  | 0.3       | 0.295       | 0.295  |       | 0.30        |
| amyloid | P08752 | GNAI2_MOUSE_1 | STOMP1 STOMP2 | 3 4  | 7        | 2       | 0.27 | 0.22 0.29 | 0.2565      | 0.292  |       | 0.29        |
| amyloid | Q3UM45 | PP1R7_MOUSE_1 | STOMP2        | 4    | 4        | 1       | 0.29 | 0.29      | 0.287       | 0.287  |       | 0.29        |
| amyloid | P14206 | RSSA_MOUSE_1  | STOMP2        | 3    | 3        | 1       | 0.28 | 0.28      | 0.28        | 0.28   |       | 0.28        |
| amyloid | Q9JIS5 | SV2A_MOUSE_1  | STOMP1        | 7    | 7        | 1       | 0.27 | 0.27      | 0.271       | 0.271  |       | 0.27        |
| amyloid | P19157 | GSTP1_MOUSE_1 | STOMP2        | 2    | 2        | 1       | 0.27 | 0.27      | 2 0.2680    | 0.268  |       | 0.27        |
| amyloid | P40124 | CAP1_MOUSE_1  | STOMP1 STOMP2 | 1 5  | 6        | 2       | 0.17 | 0.07 0.26 | 0.1655      | 0.262  |       | 0.26        |
| amyloid | Q8BGZ1 | HPCL4_MOUSE_1 | STOMP2        | 2    | 2        | 1       | 0.26 | 0.26      | 0.261       | 0.261  |       | 0.26        |
| amyloid | Q9DD18 | DTD1_MOUSE_1  | STOMP2        | 2    | 2        | 1       | 0.26 | 0.26      | 2 0.2610    | 0.261  |       | 0.26        |
| amyloid | Q8BWF0 | SSDH_MOUSE_1  | STOMP2        | 5    | 5        | 1       | 0.26 | 0.26      | 0.26        | 0.26   |       | 0.26        |
| amyloid | Q9Z1N5 | DX39B_MOUSE_1 | STOMP2        | 4    | 4        | 1       | 0.26 | 0.26      | 0.256       | 0.256  |       | 0.26        |
| amyloid | O35526 | STX1A_MOUSE_1 | STOMP1 STOMP2 | 2 3  | 5        | 2       | 0.22 | 0.17 0.26 | 0.214       | 0.255  |       | 0.26        |
| amyloid | P68368 | TBA4A_MOUSE_1 | STOMP1 STOMP2 | 8 20 | 28       | 2       | 0.25 | 0.10 0.40 | 4 16        | 0.251  | 0.404 | 0.40        |
| amyloid | Q9WVT6 | CAH14_MOUSE_1 | STOMP1        | 3    | 3        | 1       | 0.25 | 0.25      | 0.246       | 0.246  |       | 0.25        |
| amyloid | Q922J6 | TSN2_MOUSE_1  | STOMP1        | 2    | 2        | 1       | 0.24 | 0.24      | 0.243       | 0.243  |       | 0.24        |
| amyloid | P68510 | 1433F_MOUSE_1 | STOMP2        | 2    | 2        | 1       | 0.24 | 0.24      | 0.237       | 0.237  |       | 0.24        |
| amyloid | Q9WTL7 | LYPA2_MOUSE_1 | STOMP2        | 2    | 2        | 1       | 0.24 | 0.24      | 0.237       | 0.237  |       | 0.24        |
| amyloid | P08553 | NFM_MOUSE_1   | STOMP1 STOMP2 | 7 8  | 15       | 2       | 0.22 | 0.20 0.24 | 0.218       | 0.236  |       | 0.24        |
| amyloid | Q9WUM5 | SUCA_MOUSE_1  | STOMP2        | 2    | 2        | 1       | 0.23 | 0.23      | 2 0.2330    | 0.233  |       | 0.23        |
| amyloid | Q641P0 | ARP3B_MOUSE_1 | STOMP1 STOMP2 | 1 4  | 5        | 2       | 0.16 | 0.08 0.23 | 0.153       | 0.226  |       | 0.23        |
| amyloid | Q62420 | SH3G2_MOUSE_1 | STOMP2        | 3    | 3        | 1       | 0.22 | 0.22      | 0.224       | 0.224  |       | 0.22        |
| amyloid | Q8VCD6 | REEP2_MOUSE_1 | STOMP2        | 2    | 2        | 1       | 0.22 | 0.22      | 0.224       | 0.224  |       | 0.22        |
| amyloid | Q8BGU5 | CCNY_MOUSE_1  | STOMP2        | 3    | 3        | 1       | 0.22 | 0.22      | 0.218       | 0.218  |       | 0.22        |
| amyloid | P20917 | MAG_MOUSE_1   | STOMP1 STOMP2 | 5 5  | 10       | 2       | 0.21 | 0.21 0.22 | 0.2145      | 0.216  |       | 0.22        |
| amyloid | Q9QYF1 | RDH11_MOUSE_1 | STOMP1        | 2    | 2        | 1       | 0.22 | 0.22      | 2 0.2150    | 0.215  |       | 0.22        |
| amyloid | Q8BG05 | ROA3_MOUSE_1  | STOMP1 STOMP2 | 2 2  | 4        | 2       | 0.22 | 0.21 0.21 | 2 1         | 0.2125 | 0.214 | 0.21        |
| amyloid | Q01065 | PDE1B_MOUSE_1 | STOMP2        | 5    | 5        | 1       | 0.21 | 0.21      | 0.208       | 0.208  |       | 0.21        |
| amyloid | Q9CWS0 | DDAH1_MOUSE_1 | STOMP2        | 2    | 2        | 1       | 0.2  | 0.2       | 0.204       | 0.204  |       | 0.20        |
| amyloid | Q9QYX7 | PCLO_MOUSE_1  | STOMP1        | 7    | 7        | 1       | 0.2  | 0.2       | 4 0.2030    | 0.203  |       | 0.20        |
| amyloid | Q99KJ8 | DCTN2_MOUSE_1 | STOMP2        | 3    | 3        | 1       | 0.2  | 0.2       | 0.201       | 0.201  |       | 0.20        |
| amyloid | Q7TQD2 | TPPP_MOUSE_1  | STOMP1 STOMP2 | 3 11 | 14       | 2       | 0.2  | 0.10 0.31 | 2 9         | 0.2005 | 0.305 | 0.31        |
| amyloid | Q6PHZ2 | KCC2D_MOUSE_1 | STOMP1 STOMP2 | 2 4  | 6        | 2       | 0.17 | 0.11 0.20 | 0.1545      | 0.2    |       | 0.20        |

| Bait    | Prey   | PreyGene      | IP            | Spec  | Spec Sum | Num Rep | Prob | iProb     | Ctrl Counts | AvgP   | MaxP  | SAINT score |
|---------|--------|---------------|---------------|-------|----------|---------|------|-----------|-------------|--------|-------|-------------|
| amyloid | Q8K0U4 | HS12A_MOUSE_1 | STOMP2        | 5     | 5        | 1       | 0.19 | 0.19      | 0.192       | 0.192  |       | 0.19        |
| amyloid | Q8R081 | HNRPL_MOUSE_1 | STOMP1 STOMP2 | 7 3   | 10       | 2       | 0.13 | 0.19 0.07 | 7 0.1305    | 0.189  |       | 0.19        |
| amyloid | Q8BVE3 | VATH_MOUSE_1  | STOMP2        | 4     | 4        | 1       | 0.18 | 0.18      | 0.184       | 0.184  |       | 0.18        |
| amyloid | Q9JKN1 | ZNT7_MOUSE_1  | STOMP1        | 2     | 2        | 1       | 0.18 | 0.18      | 2 0.1830    | 0.183  |       | 0.18        |
| amyloid | P04247 | MYG_MOUSE_1   | STOMP2        | 3     | 3        | 1       | 0.18 | 0.18      | 4 0.1820    | 0.182  |       | 0.18        |
| amyloid | P19246 | NFH_MOUSE_1   | STOMP2        | 8     | 8        | 1       | 0.18 | 0.18      | 0.182       | 0.182  |       | 0.18        |
| amyloid | Q9QZ06 | TOLIP_MOUSE_1 | STOMP2        | 2     | 2        | 1       | 0.18 | 0.18      | 0.181       | 0.181  |       | 0.18        |
| amyloid | O35295 | PURB_MOUSE_1  | STOMP2        | 2     | 2        | 1       | 0.18 | 0.18      | 0.18        | 0.18   |       | 0.18        |
| amyloid | Q99JY9 | ARP3_MOUSE_1  | STOMP2        | 3     | 3        | 1       | 0.18 | 0.18      | 0.176       | 0.176  |       | 0.18        |
| amyloid | Q9Z1G3 | VATC1_MOUSE_1 | STOMP2        | 3     | 3        | 1       | 0.17 | 0.17      | 0.171       | 0.171  |       | 0.17        |
| amyloid | Q9D6M3 | GHC1_MOUSE_1  | STOMP1        | 2     | 2        | 1       | 0.17 | 0.17      | 0.17        | 0.17   |       | 0.17        |
| amyloid | P48453 | PP2BB_MOUSE_1 | STOMP2        | 4     | 4        | 1       | 0.16 | 0.16      | 0.164       | 0.164  |       | 0.16        |
| amyloid | Q8BJU0 | SGTA_MOUSE_1  | STOMP1        | 2     | 2        | 1       | 0.16 | 0.16      | 0.164       | 0.164  |       | 0.16        |
| amyloid | O88569 | ROA2_MOUSE_1  | STOMP2        | 8     | 8        | 1       | 0.16 | 0.16      | 9 0.1630    | 0.163  |       | 0.16        |
| amyloid | Q62188 | DPYL3_MOUSE_1 | STOMP2        | 4     | 4        | 1       | 0.16 | 0.16      | 0.161       | 0.161  |       | 0.16        |
| amyloid | Q9WUM4 | COR1C_MOUSE_1 | STOMP2        | 3     | 3        | 1       | 0.16 | 0.16      | 0.161       | 0.161  |       | 0.16        |
| amyloid | P35803 | GPM6B_MOUSE_1 | STOMP1        | 2     | 2        | 1       | 0.16 | 0.16      | 0.16        | 0.16   |       | 0.16        |
| amyloid | Q9D7G0 | PRPS1_MOUSE_1 | STOMP2        | 2     | 2        | 1       | 0.16 | 0.16      | 0.16        | 0.16   |       | 0.16        |
| amyloid | P04370 | MBP_MOUSE_1   | STOMP1 STOMP2 | 23 16 | 39       | 2       | 0.16 | 0.17 0.14 | 19 8        | 0.1575 | 0.172 | 0.17        |
| amyloid | Q9R1T4 | SEPT6_MOUSE_1 | STOMP2        | 3     | 3        | 1       | 0.16 | 0.16      | 0.157       | 0.157  |       | 0.16        |
| amyloid | Q91V14 | S12A5_MOUSE_1 | STOMP1 STOMP2 | 4 9   | 13       | 2       | 0.11 | 0.04 0.16 | 0.099       | 0.155  |       | 0.16        |
| amyloid | P35762 | CD81_MOUSE_1  | STOMP1 STOMP2 | 4 2   | 6        | 2       | 0.13 | 0.15 0.09 | 5 0.1215    | 0.153  |       | 0.15        |
| amyloid | Q922F4 | TBB6_MOUSE_1  | STOMP2        | 3     | 3        | 1       | 0.15 | 0.15      | 0.152       | 0.152  |       | 0.15        |
| amyloid | Q61548 | AP180_MOUSE_1 | STOMP2        | 6     | 6        | 1       | 0.15 | 0.15      | 0.149       | 0.149  |       | 0.15        |
| amyloid | Q9JII6 | AK1A1_MOUSE_1 | STOMP1        | 2     | 2        | 1       | 0.15 | 0.15      | 0.149       | 0.149  |       | 0.15        |
| amyloid | Q8BP47 | SYNC_MOUSE_1  | STOMP2        | 4     | 4        | 1       | 0.15 | 0.15      | 0.147       | 0.147  |       | 0.15        |
| amyloid | Q61990 | PCBP2_MOUSE_1 | STOMP2        | 2     | 2        | 1       | 0.15 | 0.15      | 0.146       | 0.146  |       | 0.15        |
| amyloid | Q31125 | S39A7_MOUSE_1 | STOMP1        | 3     | 3        | 1       | 0.14 | 0.14      | 0.143       | 0.143  |       | 0.14        |
| amyloid | Q3UHQ0 | AAK1_MOUSE_1  | STOMP2        | 6     | 6        | 1       | 0.14 | 0.14      | 0.136       | 0.136  |       | 0.14        |
| amyloid | Q61644 | PACN1_MOUSE_1 | STOMP1 STOMP2 | 9 9   | 18       | 2       | 0.13 | 0.12 0.14 | 10 0.1295   | 0.136  |       | 0.14        |
| amyloid | Q9CZ44 | NSF1C_MOUSE_1 | STOMP2        | 2     | 2        | 1       | 0.13 | 0.13      | 0.134       | 0.134  |       | 0.13        |
| amyloid | P03911 | NU4M_MOUSE_1  | STOMP1        | 3     | 3        | 1       | 0.13 | 0.13      | 4 0.1330    | 0.133  |       | 0.13        |



| Bait    | Prey   | PreyGene      | IP            | Spec  | Spec Sum | Num Rep | Prob | iProb     | Ctrl Counts | AvgP   | MaxP  | SAINT score |
|---------|--------|---------------|---------------|-------|----------|---------|------|-----------|-------------|--------|-------|-------------|
| amyloid | Q640R3 | HECAM_MOUSE_1 | STOMP2        | 2     | 2        | 1       | 0.13 | 0.13      | 0.131       | 0.131  |       | 0.13        |
| amyloid | P61161 | ARP2_MOUSE_1  | STOMP2        | 2     | 2        | 1       | 0.13 | 0.13      | 0.13        | 0.13   |       | 0.13        |
| amyloid | Q61301 | CTNA2_MOUSE_1 | STOMP2        | 6     | 6        | 1       | 0.13 | 0.13      | 0.129       | 0.129  |       | 0.13        |
| amyloid | Q99L43 | CDS2_MOUSE_1  | STOMP1        | 2     | 2        | 1       | 0.13 | 0.13      | 2 0.1290    | 0.129  |       | 0.13        |
| amyloid | Q8CGK7 | GNAL_MOUSE_1  | STOMP2        | 2     | 2        | 1       | 0.13 | 0.13      | 0.126       | 0.126  |       | 0.13        |
| amyloid | Q8BPN8 | DMXL2_MOUSE_1 | STOMP1 STOMP2 | 61 7  | 68       | 2       | 0.12 | 0.25 0.00 | 88 2        | 0.1245 | 0.249 | 0.25        |
| amyloid | P68181 | KAPCB_MOUSE_1 | STOMP1        | 2     | 2        | 1       | 0.12 | 0.12      | 0.121       | 0.121  |       | 0.12        |
| amyloid | P54285 | CACB3_MOUSE_1 | STOMP1        | 2     | 2        | 1       | 0.12 | 0.12      | 2 0.1190    | 0.119  |       | 0.12        |
| amyloid | Q922H2 | PDK3_MOUSE_1  | STOMP2        | 2     | 2        | 1       | 0.12 | 0.12      | 0.118       | 0.118  |       | 0.12        |
| amyloid | O35286 | DHX15_MOUSE_1 | STOMP1        | 15    | 15       | 1       | 0.12 | 0.12      | 17 0.1170   | 0.117  |       | 0.12        |
| amyloid | Q8VE33 | GD1L1_MOUSE_1 | STOMP1 STOMP2 | 1 2   | 3        | 2       | 0.09 | 0.07 0.12 | 0.095       | 0.117  |       | 0.12        |
| amyloid | Q91WC3 | ACSL6_MOUSE_1 | STOMP2        | 4     | 4        | 1       | 0.12 | 0.12      | 0.117       | 0.117  |       | 0.12        |
| amyloid | Q9EQF6 | DPYL5_MOUSE_1 | STOMP2        | 3     | 3        | 1       | 0.11 | 0.11      | 0.113       | 0.113  |       | 0.11        |
| amyloid | P09671 | SODM_MOUSE_1  | STOMP1 STOMP2 | 10 4  | 14       | 2       | 0.11 | 0.17 0.06 | 9 5         | 0.112  | 0.169 | 0.17        |
| amyloid | Q921F2 | TADBP_MOUSE_1 | STOMP1 STOMP2 | 2 2   | 4        | 2       | 0.11 | 0.09 0.11 | 4 0.1030    | 0.112  |       | 0.11        |
| amyloid | Q61699 | HS105_MOUSE_1 | STOMP2        | 5     | 5        | 1       | 0.11 | 0.11      | 0.11        | 0.11   |       | 0.11        |
| amyloid | P54830 | PTN5_MOUSE_1  | STOMP2        | 3     | 3        | 1       | 0.1  | 0.1       | 0.104       | 0.104  |       | 0.10        |
| amyloid | P97441 | ZNT3_MOUSE_1  | STOMP1        | 8     | 8        | 1       | 0.1  | 0.1       | 11 0.1000   | 0.1    |       | 0.10        |
| amyloid | Q6P1F6 | 2ABA_MOUSE_1  | STOMP2        | 2     | 2        | 1       | 0.1  | 0.1       | 0.1         | 0.1    |       | 0.10        |
| amyloid | Q8CHH9 | SEPT8_MOUSE_1 | STOMP2        | 2     | 2        | 1       | 0.1  | 0.1       | 0.099       | 0.099  |       | 0.10        |
| amyloid | Q5SRX1 | TM1L2_MOUSE_1 | STOMP2        | 2     | 2        | 1       | 0.1  | 0.1       | 0.098       | 0.098  |       | 0.10        |
| amyloid | Q8BG39 | SV2B_MOUSE_1  | STOMP1        | 4     | 4        | 1       | 0.1  | 0.1       | 0.098       | 0.098  |       | 0.10        |
| amyloid | Q3V0I2 | PRR7_MOUSE_1  | STOMP1        | 7     | 7        | 1       | 0.1  | 0.1       | 10 0.0970   | 0.097  |       | 0.10        |
| amyloid | P80313 | TCPH_MOUSE_1  | STOMP2        | 2     | 2        | 1       | 0.09 | 0.09      | 0.094       | 0.094  |       | 0.09        |
| amyloid | Q8R071 | IP3KA_MOUSE_1 | STOMP2        | 2     | 2        | 1       | 0.09 | 0.09      | 0.094       | 0.094  |       | 0.09        |
| amyloid | P11798 | KCC2A_MOUSE_1 | STOMP1 STOMP2 | 67 42 | 109      | 2       | 0.1  | 0.10 0.09 | 56 21       | 0.093  | 0.101 | 0.10        |
| amyloid | O54829 | RGS7_MOUSE_1  | STOMP2        | 2     | 2        | 1       | 0.09 | 0.09      | 0.09        | 0.09   |       | 0.09        |
| amyloid | Q8CAA7 | PGM2L_MOUSE_1 | STOMP2        | 3     | 3        | 1       | 0.09 | 0.09      | 0.09        | 0.09   |       | 0.09        |
| amyloid | Q9QUG9 | GRP2_MOUSE_1  | STOMP1        | 3     | 3        | 1       | 0.09 | 0.09      | 0.09        | 0.09   |       | 0.09        |
| amyloid | P62806 | H4_MOUSE_1    | STOMP1        | 3     | 3        | 1       | 0.09 | 0.09      | 3 4         | 0.089  | 0.089 | 0.09        |
| amyloid | Q9JJK2 | LANC2_MOUSE_1 | STOMP2        | 2     | 2        | 1       | 0.09 | 0.09      | 0.089       | 0.089  |       | 0.09        |
| amyloid | O35737 | HNRH1_MOUSE_1 | STOMP1 STOMP2 | 3 4   | 7        | 2       | 0.08 | 0.06 0.09 | 8 0.0760    | 0.088  |       | 0.09        |

| Bait    | Prey   | PreyGene      | IP            | Spec | Spec Sum | Num Rep | Prob | iProb     | Ctrl Counts | AvgP  | MaxP  | SAINT score |
|---------|--------|---------------|---------------|------|----------|---------|------|-----------|-------------|-------|-------|-------------|
| amyloid | Q923T9 | KCC2G_MOUSE_1 | STOMP1 STOMP2 | 2 3  | 5        | 2       | 0.09 | 0.07 0.09 | 5 0.0805    | 0.088 |       | 0.09        |
| amyloid | Q6P5F7 | TTYH3_MOUSE_1 | STOMP1 STOMP2 | 2 2  | 4        | 2       | 0.08 | 0.07 0.09 | 0.079       | 0.087 |       | 0.09        |
| amyloid | Q6PH08 | ERC2_MOUSE_1  | STOMP1        | 12   | 12       | 1       | 0.09 | 0.09      | 25 2        | 0.087 | 0.087 | 0.09        |
| amyloid | P17809 | GTR1_MOUSE_1  | STOMP1        | 2    | 2        | 1       | 0.09 | 0.09      | 0.086       | 0.086 |       | 0.09        |
| amyloid | Q8R0S2 | IQEC1_MOUSE_1 | STOMP1        | 18   | 18       | 1       | 0.09 | 0.09      | 21 0.0850   | 0.085 |       | 0.09        |
| amyloid | Q3UTQ8 | CDKL5_MOUSE_1 | STOMP1        | 6    | 6        | 1       | 0.08 | 0.08      | 8 0.0810    | 0.081 |       | 0.08        |
| amyloid | Q62108 | DLG4_MOUSE_1  | STOMP1        | 4    | 4        | 1       | 0.08 | 0.08      | 8 0.0810    | 0.081 |       | 0.08        |
| amyloid | Q9Z1W8 | AT12A_MOUSE_1 | STOMP2        | 6    | 6        | 1       | 0.08 | 0.08      | 0.08        | 0.08  |       | 0.08        |
| amyloid | O55143 | AT2A2_MOUSE_1 | STOMP2        | 5    | 5        | 1       | 0.08 | 0.08      | 0.079       | 0.079 |       | 0.08        |
| amyloid | P08113 | ENPL_MOUSE_1  | STOMP2        | 4    | 4        | 1       | 0.08 | 0.08      | 0.078       | 0.078 |       | 0.08        |
| amyloid | P16388 | KCNA1_MOUSE_1 | STOMP1        | 2    | 2        | 1       | 0.08 | 0.08      | 0.078       | 0.078 |       | 0.08        |
| amyloid | Q8K4G5 | ABLM1_MOUSE_1 | STOMP1        | 7    | 7        | 1       | 0.08 | 0.08      | 11 0.0780   | 0.078 |       | 0.08        |
| amyloid | P24529 | TY3H_MOUSE_1  | STOMP2        | 2    | 2        | 1       | 0.08 | 0.08      | 0.077       | 0.077 |       | 0.08        |
| amyloid | Q8C031 | LRC4C_MOUSE_1 | STOMP1        | 5    | 5        | 1       | 0.08 | 0.08      | 9 0.0770    | 0.077 |       | 0.08        |
| amyloid | Q9D0K2 | SCOT1_MOUSE_1 | STOMP2        | 2    | 2        | 1       | 0.08 | 0.08      | 0.077       | 0.077 |       | 0.08        |
| amyloid | Q8BUV3 | GEPH_MOUSE_1  | STOMP1 STOMP2 | 1 3  | 4        | 2       | 0.06 | 0.04 0.08 | 0.0565      | 0.076 |       | 0.08        |
| amyloid | Q9JLM8 | DCLK1_MOUSE_1 | STOMP1 STOMP2 | 1 4  | 5        | 2       | 0.05 | 0.03 0.07 | 0.0525      | 0.073 |       | 0.07        |
| amyloid | P68404 | KPCB_MOUSE_1  | STOMP1        | 3    | 3        | 1       | 0.07 | 0.07      | 0.072       | 0.072 |       | 0.07        |
| amyloid | Q61151 | 2A5E_MOUSE_1  | STOMP2        | 2    | 2        | 1       | 0.07 | 0.07      | 0.071       | 0.071 |       | 0.07        |
| amyloid | Q8C3Q5 | SHSA7_MOUSE_1 | STOMP1        | 16   | 16       | 1       | 0.07 | 0.07      | 21 0.0710   | 0.071 |       | 0.07        |
| amyloid | Q3UTJ2 | SRBS2_MOUSE_1 | STOMP1        | 13   | 13       | 1       | 0.07 | 0.07      | 18 0.0690   | 0.069 |       | 0.07        |
| amyloid | O35927 | CTND2_MOUSE_1 | STOMP1        | 5    | 5        | 1       | 0.07 | 0.07      | 5 0.0670    | 0.067 |       | 0.07        |
| amyloid | Q01063 | PDE4D_MOUSE_1 | STOMP1        | 3    | 3        | 1       | 0.07 | 0.07      | 4 0.0670    | 0.067 |       | 0.07        |
| amyloid | Q505F5 | LRC47_MOUSE_1 | STOMP2        | 2    | 2        | 1       | 0.07 | 0.07      | 0.066       | 0.066 |       | 0.07        |
| amyloid | Q5DTL9 | S4A10_MOUSE_1 | STOMP1        | 15   | 15       | 1       | 0.07 | 0.07      | 22 0.0660   | 0.066 |       | 0.07        |
| amyloid | Q8CA95 | PDE10_MOUSE_1 | STOMP2        | 4    | 4        | 1       | 0.07 | 0.07      | 0.066       | 0.066 |       | 0.07        |
| amyloid | Q9JJY3 | NSMA2_MOUSE_1 | STOMP1 STOMP2 | 2 2  | 4        | 2       | 0.06 | 0.07 0.06 | 0.062       | 0.066 |       | 0.07        |
| amyloid | Q91VR5 | DDX1_MOUSE_1  | STOMP1 STOMP2 | 3 2  | 5        | 2       | 0.04 | 0.07 0.04 | 5 0.0510    | 0.065 |       | 0.07        |
| amyloid | Q8CGY8 | OGT1_MOUSE_1  | STOMP1        | 5    | 5        | 1       | 0.06 | 0.06      | 0.06        | 0.06  |       | 0.06        |
| amyloid | O35681 | SYT3_MOUSE_1  | STOMP1        | 3    | 3        | 1       | 0.06 | 0.06      | 8 0.0590    | 0.059 |       | 0.06        |
| amyloid | Q9QXS6 | DREB_MOUSE_1  | STOMP2        | 2    | 2        | 1       | 0.06 | 0.06      | 0.059       | 0.059 |       | 0.06        |
| amyloid | Q91V92 | ACLY_MOUSE_1  | STOMP1 STOMP2 | 3 4  | 7        | 2       | 0.04 | 0.04 0.06 | 0.0485      | 0.058 |       | 0.06        |

| Bait    | Prey   | PreyGene      | IP            | Spec  | Spec Sum | Num Rep | Prob | iProb     | Ctrl Counts | AvgP   | MaxP | SAINT score |
|---------|--------|---------------|---------------|-------|----------|---------|------|-----------|-------------|--------|------|-------------|
| amyloid | P0C192 | LRC4B_MOUSE_1 | STOMP1        | 2     | 2        | 1       | 0.06 | 0.06      | 0.055       | 0.055  |      | 0.06        |
| amyloid | Q8JZQ9 | EIF3B_MOUSE_1 | STOMP1 STOMP2 | 2 2   | 4        | 2       | 0.05 | 0.06 0.04 | 2 0.0495    | 0.055  |      | 0.06        |
| amyloid | Q8JZR6 | S4A8_MOUSE_1  | STOMP1        | 6     | 6        | 1       | 0.05 | 0.05      | 11 0.0540   | 0.054  |      | 0.05        |
| amyloid | Q9Z2V5 | HDAC6_MOUSE_1 | STOMP1        | 7     | 7        | 1       | 0.05 | 0.05      | 12 0.0530   | 0.053  |      | 0.05        |
| amyloid | Q8VEK3 | HNRPU_MOUSE_1 | STOMP1 STOMP2 | 4 2   | 6        | 2       | 0.04 | 0.05 0.04 | 9 0.0430    | 0.05   |      | 0.05        |
| amyloid | Q8VIJ6 | SFPQ_MOUSE_1  | STOMP1 STOMP2 | 12 10 | 22       | 2       | 0.04 | 0.05 0.05 | 19 0.0465   | 0.048  |      | 0.05        |
| amyloid | Q9Z268 | RASL1_MOUSE_1 | STOMP2        | 2     | 2        | 1       | 0.05 | 0.05      | 0.048       | 0.048  |      | 0.05        |
| amyloid | Q80TZ3 | AUXI_MOUSE_1  | STOMP2        | 3     | 3        | 1       | 0.05 | 0.05      | 0.047       | 0.047  |      | 0.05        |
| amyloid | Q811D0 | DLG1_MOUSE_1  | STOMP2        | 3     | 3        | 1       | 0.05 | 0.05      | 0.047       | 0.047  |      | 0.05        |
| amyloid | Q8BMT4 | LRC33_MOUSE_1 | STOMP2        | 3     | 3        | 1       | 0.05 | 0.05      | 8 0.0470    | 0.047  |      | 0.05        |
| amyloid | P10493 | NID1_MOUSE_1  | STOMP1        | 4     | 4        | 1       | 0.05 | 0.05      | 0.046       | 0.046  |      | 0.05        |
| amyloid | Q01097 | NMDE2_MOUSE_1 | STOMP1        | 10    | 10       | 1       | 0.05 | 0.05      | 17 0.0450   | 0.045  |      | 0.05        |
| amyloid | Q6IFZ6 | K2C1B_MOUSE_1 | STOMP1 STOMP2 | 3 6   | 9        | 2       | 0.05 | 0.04 0.05 | 3 14        | 0.0435 | 0.05 | 0.05        |
| amyloid | Q8C419 | GP158_MOUSE_1 | STOMP1        | 3     | 3        | 1       | 0.04 | 0.04      | 0.043       | 0.043  |      | 0.04        |
| amyloid | O54991 | CNTP1_MOUSE_1 | STOMP1        | 4     | 4        | 1       | 0.04 | 0.04      | 0.041       | 0.041  |      | 0.04        |
| amyloid | Q80U40 | RIMB2_MOUSE_1 | STOMP1        | 3     | 3        | 1       | 0.04 | 0.04      | 5 0.0410    | 0.041  |      | 0.04        |
| amyloid | Q810B7 | SLIK5_MOUSE_1 | STOMP1        | 3     | 3        | 1       | 0.04 | 0.04      | 6 0.0410    | 0.041  |      | 0.04        |
| amyloid | Q8CHC4 | SYNJ1_MOUSE_1 | STOMP1 STOMP2 | 2 5   | 7        | 2       | 0.03 | 0.02 0.04 | 0.0305      | 0.041  |      | 0.04        |
| amyloid | Q99MX7 | CECR6_MOUSE_1 | STOMP1        | 4     | 4        | 1       | 0.04 | 0.04      | 11 0.0410   | 0.041  |      | 0.04        |
| amyloid | Q8BIZ1 | ANS1B_MOUSE_1 | STOMP2        | 3     | 3        | 1       | 0.04 | 0.04      | 0.04        | 0.04   |      | 0.04        |
| amyloid | Q8CC35 | SYNPO_MOUSE_1 | STOMP2        | 3     | 3        | 1       | 0.04 | 0.04      | 0.04        | 0.04   |      | 0.04        |
| amyloid | P13595 | NCAM1_MOUSE_1 | STOMP2        | 2     | 2        | 1       | 0.04 | 0.04      | 0.039       | 0.039  |      | 0.04        |
| amyloid | P70168 | IMB1_MOUSE_1  | STOMP2        | 3     | 3        | 1       | 0.04 | 0.04      | 0.037       | 0.037  |      | 0.04        |
| amyloid | Q3B7Z2 | OSBP1_MOUSE_1 | STOMP1        | 2     | 2        | 1       | 0.04 | 0.04      | 0.037       | 0.037  |      | 0.04        |
| amyloid | P70175 | DLG3_MOUSE_1  | STOMP1        | 2     | 2        | 1       | 0.04 | 0.04      | 3 0.0360    | 0.036  |      | 0.04        |
| amyloid | O35449 | PRRT1_MOUSE_1 | STOMP1        | 7     | 7        | 1       | 0.04 | 0.04      | 15 0.0350   | 0.035  |      | 0.04        |
| amyloid | P57780 | ACTN4_MOUSE_1 | STOMP2        | 2     | 2        | 1       | 0.03 | 0.03      | 0.033       | 0.033  |      | 0.03        |
| amyloid | P70414 | NAC1_MOUSE_1  | STOMP1 STOMP2 | 2 2   | 4        | 2       | 0.03 | 0.03 0.03 | 5 0.0290    | 0.033  |      | 0.03        |
| amyloid | Q11011 | PSA_MOUSE_1   | STOMP1        | 2     | 2        | 1       | 0.03 | 0.03      | 0.032       | 0.032  |      | 0.03        |
| amyloid | Q9JHU4 | DYHC1_MOUSE_1 | STOMP1 STOMP2 | 3 20  | 23       | 2       | 0.02 | 0.01 0.03 | 0.023       | 0.032  |      | 0.03        |
| amyloid | Q9Z2D6 | MECP2_MOUSE_1 | STOMP1        | 2     | 2        | 1       | 0.03 | 0.03      | 8 0.0310    | 0.031  |      | 0.03        |
| amyloid | O35954 | PITM1_MOUSE_1 | STOMP2        | 2     | 2        | 1       | 0.03 | 0.03      | 0.03        | 0.03   |      | 0.03        |

| Bait    | Prey   | PreyGene      | IP            | Spec  | Spec Sum | Num Rep | Prob | iProb     | Ctrl Counts | AvgP   | MaxP  | SAINT score |
|---------|--------|---------------|---------------|-------|----------|---------|------|-----------|-------------|--------|-------|-------------|
| amyloid | Q5DU25 | IQEC2_MOUSE_1 | STOMP1        | 31    | 31       | 1       | 0.03 | 0.03      | 53 0.0300   | 0.03   |       | 0.03        |
| amyloid | Q9QXL2 | KI21A_MOUSE_1 | STOMP2        | 4     | 4        | 1       | 0.03 | 0.03      | 0.03        | 0.03   |       | 0.03        |
| amyloid | P00920 | CAH2_MOUSE_1  | STOMP1        | 9     | 9        | 1       | 0.03 | 0.03      | 17 0.0280   | 0.028  |       | 0.03        |
| amyloid | Q8CIQ7 | DOCK3_MOUSE_1 | STOMP1        | 8     | 8        | 1       | 0.03 | 0.03      | 13 0.0280   | 0.028  |       | 0.03        |
| amyloid | Q91XM9 | DLG2_MOUSE_1  | STOMP1        | 11    | 11       | 1       | 0.03 | 0.03      | 23 0.0260   | 0.026  |       | 0.03        |
| amyloid | P02535 | K1C10_MOUSE_1 | STOMP1 STOMP2 | 6 12  | 18       | 2       | 0.03 | 0.01 0.03 | 11 21       | 0.024  | 0.034 | 0.03        |
| amyloid | P70704 | AT8A1_MOUSE_1 | STOMP1 STOMP2 | 3 3   | 6        | 2       | 0.02 | 0.02 0.02 | 0.023       | 0.024  |       | 0.02        |
| amyloid | Q3UHD9 | AGAP2_MOUSE_1 | STOMP2        | 2     | 2        | 1       | 0.02 | 0.02      | 0.024       | 0.024  |       | 0.02        |
| amyloid | P51830 | ADCY9_MOUSE_1 | STOMP1        | 2     | 2        | 1       | 0.02 | 0.02      | 0.023       | 0.023  |       | 0.02        |
| amyloid | Q4KMM3 | OXR1_MOUSE_1  | STOMP2        | 2     | 2        | 1       | 0.02 | 0.02      | 0.023       | 0.023  |       | 0.02        |
| amyloid | Q9WTS6 | TEN3_MOUSE_1  | STOMP2        | 6     | 6        | 1       | 0.02 | 0.02      | 0.022       | 0.022  |       | 0.02        |
| amyloid | Q9CQZ6 | NDUB3_MOUSE_1 | STOMP1        | 6     | 6        | 1       | 0.02 | 0.02      | 11 0.0210   | 0.021  |       | 0.02        |
| amyloid | A2AQ25 | SKT_MOUSE_1   | STOMP1        | 6     | 6        | 1       | 0.02 | 0.02      | 10 0.0200   | 0.02   |       | 0.02        |
| amyloid | Q99K48 | NONO_MOUSE_1  | STOMP1 STOMP2 | 28 1  | 29       | 2       | 0.01 | 0.02 0.00 | 41 0.0120   | 0.02   |       | 0.02        |
| amyloid | P14873 | MAP1B_MOUSE_1 | STOMP1 STOMP2 | 4 7   | 11       | 2       | 0.01 | 0.01 0.02 | 0.011       | 0.017  |       | 0.02        |
| amyloid | Q8CHG7 | RPGF2_MOUSE_1 | STOMP1        | 2     | 2        | 1       | 0.02 | 0.02      | 0.016       | 0.016  |       | 0.02        |
| amyloid | Q61292 | LAMB2_MOUSE_1 | STOMP1        | 24    | 24       | 1       | 0.02 | 0.02      | 48 0.0150   | 0.015  |       | 0.02        |
| amyloid | Q8CGP5 | H2A1F_MOUSE_1 | STOMP1 STOMP2 | 6 6   | 12       | 2       | 0.01 | 0.02 0.01 | 10 6        | 0.0145 | 0.015 | 0.02        |
| amyloid | P04104 | K2C1_MOUSE_1  | STOMP2        | 9     | 9        | 1       | 0.01 | 0.01      | 25 0.0140   | 0.014  |       | 0.01        |
| amyloid | P19096 | FAS_MOUSE_1   | STOMP2        | 6     | 6        | 1       | 0.01 | 0.01      | 0.014       | 0.014  |       | 0.01        |
| amyloid | Q08460 | KCMA1_MOUSE_1 | STOMP2        | 3     | 3        | 1       | 0.01 | 0.01      | 0.014       | 0.014  |       | 0.01        |
| amyloid | Q6PFD5 | DLGP3_MOUSE_1 | STOMP1 STOMP2 | 21 2  | 23       | 2       | 0.01 | 0.01 0.01 | 42 0.0100   | 0.014  |       | 0.01        |
| amyloid | P97445 | CAC1A_MOUSE_1 | STOMP1 STOMP2 | 3 1   | 4        | 2       | 0.01 | 0.01 0.01 | 5 0.0125    | 0.013  |       | 0.01        |
| amyloid | Q02566 | MYH6_MOUSE_1  | STOMP2        | 10    | 10       | 1       | 0.01 | 0.01      | 51 0.0130   | 0.013  |       | 0.01        |
| amyloid | Q9EQZ7 | RIMS2_MOUSE_1 | STOMP1        | 2     | 2        | 1       | 0.01 | 0.01      | 4 0.0120    | 0.012  |       | 0.01        |
| amyloid | Q6KCD5 | NIPBL_MOUSE_1 | STOMP2        | 6     | 6        | 1       | 0.01 | 0.01      | 9 0.0110    | 0.011  |       | 0.01        |
| amyloid | Q811P8 | RHG32_MOUSE_1 | STOMP1        | 11    | 11       | 1       | 0.01 | 0.01      | 26 0.0110   | 0.011  |       | 0.01        |
| amyloid | Q8VED5 | K2C79_MOUSE_1 | STOMP1 STOMP2 | 2 4   | 6        | 2       | 0.01 | 0.01 0.01 | 4 26        | 0.0105 | 0.012 | 0.01        |
| amyloid | O88737 | BSN_MOUSE_1   | STOMP1 STOMP2 | 67 12 | 79       | 2       | 0.01 | 0.01 0.01 | 118 0.0085  | 0.01   |       | 0.01        |
| amyloid | Q6NS60 | FBX41_MOUSE_1 | STOMP1        | 11    | 11       | 1       | 0.01 | 0.01      | 32 0.0080   | 0.008  |       | 0.01        |
| amyloid | Q0KL02 | TRIO_MOUSE_1  | STOMP1        | 4     | 4        | 1       | 0.01 | 0.01      | 12 0.0060   | 0.006  |       | 0.01        |
| amyloid | Q3TTY5 | K22E_MOUSE_1  | STOMP1 STOMP2 | 4 8   | 12       | 2       | 0.01 | 0.00 0.01 | 7 24        | 0.0055 | 0.011 | 0.01        |

| Bait    | Prey   | PreyGene      | IP            | Spec | Spec Sum | Num Rep | Prob | iProb     | Ctrl Counts | AvgP  | MaxP | SAINT score |
|---------|--------|---------------|---------------|------|----------|---------|------|-----------|-------------|-------|------|-------------|
| amyloid | Q9QXS1 | PLEC_MOUSE_1  | STOMP2        | 11   | 11       | 1       | 0.01 | 0.01      | 0.005       | 0.005 |      | 0.01        |
| amyloid | P62737 | ACTA_MOUSE_1  | STOMP1 STOMP2 | 9 38 | 47       | 2       | 0    | 0.00 0.00 | 65 0.0025   | 0.004 |      | 0.00        |
| amyloid | Q05793 | PGBM_MOUSE_1  | STOMP1        | 6    | 6        | 1       | 0    | 0         | 18 0.0030   | 0.003 |      | 0.00        |
| amyloid | Q61001 | LAMA5_MOUSE_1 | STOMP1        | 2    | 2        | 1       | 0    | 0         | 4 0.0030    | 0.003 |      | 0.00        |
| amyloid | Q9JMH9 | MY18A_MOUSE_1 | STOMP2        | 2    | 2        | 1       | 0    | 0         | 0.003       | 0.003 |      | 0.00        |
| amyloid | Q9R1P4 | PSA1_MOUSE_1  | STOMP1        | 157  | 157      | 1       | 0    | 0         | 165 0.0030  | 0.003 |      | 0.00        |
| amyloid | A2CG49 | KALRN_MOUSE_1 | STOMP1        | 4    | 4        | 1       | 0    | 0         | 14 0.0020   | 0.002 |      | 0.00        |
| amyloid | Q9ESE1 | LRBA_MOUSE_1  | STOMP2        | 2    | 2        | 1       | 0    | 0         | 0.001       | 0.001 |      | 0.00        |
| amyloid | O55126 | NIPS2_MOUSE_1 | STOMP1        | 1    | 1        | 1       | 0    | 0         | 0           | 0     |      | 0.00        |
| amyloid | O88456 | CPNS1_MOUSE_1 | STOMP2        | 1    | 1        | 1       | 0    | 0         | 0           | 0     |      | 0.00        |
| amyloid | P20444 | KPCA_MOUSE_1  | STOMP2        | 1    | 1        | 1       | 0    | 0         | 0           | 0     |      | 0.00        |
| amyloid | P21278 | GNA11_MOUSE_1 | STOMP2        | 1    | 1        | 1       | 0    | 0         | 0           | 0     |      | 0.00        |
| amyloid | P46471 | PRS7_MOUSE_1  | STOMP2        | 1    | 1        | 1       | 0    | 0         | 0           | 0     |      | 0.00        |
| amyloid | P46664 | PURA2_MOUSE_1 | STOMP2        | 1    | 1        | 1       | 0    | 0         | 0           | 0     |      | 0.00        |
| amyloid | P48774 | GSTM5_MOUSE_1 | STOMP2        | 1    | 1        | 1       | 0    | 0         | 0           | 0     |      | 0.00        |
| amyloid | Q3U0V1 | FUBP2_MOUSE_1 | STOMP2        | 1    | 1        | 1       | 0    | 0         | 0           | 0     |      | 0.00        |
| amyloid | Q62418 | DBNL_MOUSE_1  | STOMP2        | 1    | 1        | 1       | 0    | 0         | 0           | 0     |      | 0.00        |
| amyloid | Q62433 | NDRG1_MOUSE_1 | STOMP1        | 1    | 1        | 1       | 0    | 0         | 0           | 0     |      | 0.00        |
| amyloid | Q6GSS7 | H2A2A_MOUSE_1 | STOMP1        | 1    | 1        | 1       | 0    | 0         | 0           | 0     |      | 0.00        |
| amyloid | Q6IME9 | K2C72_MOUSE_1 | STOMP2        | 1    | 1        | 1       | 0    | 0         | 3 8         | 0     | 0    | 0.00        |
| amyloid | Q80SU7 | GVIN1_MOUSE_1 | STOMP1        | 1    | 1        | 1       | 0    | 0         | 0           | 0     |      | 0.00        |
| amyloid | Q8BH95 | ECHM_MOUSE_1  | STOMP2        | 1    | 1        | 1       | 0    | 0         | 0           | 0     |      | 0.00        |
| amyloid | Q8BHZ4 | ZN592_MOUSE_1 | STOMP1        | 1    | 1        | 1       | 0    | 0         | 0           | 0     |      | 0.00        |
| amyloid | Q8BL65 | ABLM2_MOUSE_1 | STOMP1        | 1    | 1        | 1       | 0    | 0         | 0           | 0     |      | 0.00        |
| amyloid | Q8BVG4 | DPP9_MOUSE_1  | STOMP1        | 1    | 1        | 1       | 0    | 0         | 0           | 0     |      | 0.00        |
| amyloid | Q8VDD5 | MYH9_MOUSE_1  | STOMP2        | 1    | 1        | 1       | 0    | 0         | 0           | 0     |      | 0.00        |
| amyloid | Q91X97 | NCALD_MOUSE_1 | STOMP2        | 1    | 1        | 1       | 0    | 0         | 0           | 0     |      | 0.00        |
| amyloid | Q91YE6 | IPO9_MOUSE_1  | STOMP2        | 1    | 1        | 1       | 0    | 0         | 0           | 0     |      | 0.00        |
| amyloid | Q921M7 | FA49B_MOUSE_1 | STOMP1 STOMP2 | 1 1  | 2        | 2       | 0    | 0.00 0.00 | 0           | 0     |      | 0.00        |
| amyloid | Q922S4 | PDE2A_MOUSE_1 | STOMP1        | 1    | 1        | 1       | 0    | 0         | 1 0.0000    | 0     |      | 0.00        |
| amyloid | Q922U2 | K2C5_MOUSE_1  | STOMP1 STOMP2 | 6 4  | 10       | 2       | 0    | 0.00 0.00 | 10 69       | 0     | 0    | 0.00        |
| amyloid | Q9CZ04 | CSN7A_MOUSE_1 | STOMP2        | 1    | 1        | 1       | 0    | 0         | 0           | 0     |      | 0.00        |



| Bait    | Prey   | PreyGene      | IP     | Spec | Spec Sum | Num Rep | Prob | iProb | Ctrl Counts | AvgP | MaxP | SAINT score |
|---------|--------|---------------|--------|------|----------|---------|------|-------|-------------|------|------|-------------|
| amyloid | Q9CZ30 | OLA1_MOUSE_1  | STOMP2 | 1    | 1        | 1       | 0    | 0     | 0           | 0    |      | 0.00        |
| amyloid | Q9D0L8 | MCES_MOUSE_1  | STOMP2 | 1    | 1        | 1       | 0    | 0     | 0           | 0    |      | 0.00        |
| amyloid | Q9DCU2 | PLL_P_MOUSE_1 | STOMP1 | 1    | 1        | 1       | 0    | 0     | 0           | 0    |      | 0.00        |
| amyloid | Q9ER00 | STX12_MOUSE_1 | STOMP2 | 1    | 1        | 1       | 0    | 0     | 0           | 0    |      | 0.00        |
| amyloid | Q9R1Q8 | TAGL3_MOUSE_1 | STOMP2 | 1    | 1        | 1       | 0    | 0     | 0           | 0    |      | 0.00        |
| amyloid | Q9WV60 | GSK3B_MOUSE_1 | STOMP2 | 1    | 1        | 1       | 0    | 0     | 0           | 0    |      | 0.00        |
