# Supplementary material for: Determining composition of micron-scale protein deposits in neurodegenerative disease by spatially targeted optical microproteomics
Source: eLife journal article supplement (doi:10.7554/elife.09579), 2015-09-29
Supplement: supp [file elife-09579-supp-v1.zip]

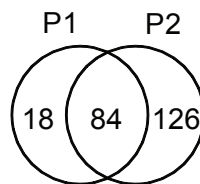

Figure 2—figure supplement 2. **Correlation of biological replicates.**

Biological replicates of STOMP analysis of amyloid plaque material from TgCRND8 mice shows good repeatability. Using our thresholding criteria (at least 3 spectral counts for each identified protein, at least 3-fold excess over corresponding dark control) one sample run (P1) identified fewer total proteins than the other (P2), however most proteins identified in P1 were also detected in P2.
